# Supplementary material for: Revisiting the Radiosynthesis of [18F]FPEB and Preliminary PET Imaging in a Mouse Model of Alzheimer’s Disease
Source: PubMed Central journal article supplement (PMC7070414; doi:10.3390/molecules25040982), 2020-02-22
Supplement: molecules-25-00982-s001.pdf [file molecules-25-00982-s001.pdf]

Supplementary information

# Revisiting the Radiosynthesis of [<sup>18</sup>F]FPEB and Preliminary PET Imaging in a Mouse Model of Alzheimer's Disease

Cassis Varlow <sup>1,2</sup>, Emily Murrell <sup>1</sup>, Jason P. Holland <sup>3,4</sup>, Alina Kassenbrock <sup>3</sup>, Whitney Shannon <sup>1,5</sup>, Steven H. Liang <sup>3</sup>, Neil Vasdev <sup>1,3,6,\*</sup> and Nickeisha A. Stephenson <sup>1,3,7,\*</sup>

<sup>1</sup> Azrieli Centre for Neuro-Radiochemistry, Brain Health Imaging Centre, Centre for Addiction and Mental Health, Toronto, M5T 1R8 ON, Canada; cassis.varlow@mail.utoronto.ca (C.V.); emily.murrell@camhpet.ca (E.M.); wes728@mail.usask.ca (W.S.)

<sup>2</sup> Institute of Medical Science, University of Toronto, Toronto, M5S1A8 ON, Canada

<sup>3</sup> Division of Nuclear Medicine and Molecular Imaging, Massachusetts General Hospital & Department of Radiology, Harvard Medical School, MA 02114 Boston, MA, USA. jason.holland@chem.uzh.ch (J.P.H.); alinakassenbrock@gmail.com (A. K.); Liang.Steven@mgh.harvard.edu (S.V.L.)

<sup>4</sup> Department of Chemistry, University of Zurich, 8057 Zurich, Switzerland

<sup>5</sup> Department of Chemistry, University of Saskatchewan, Saskatoon S7N 0X2, SK, Canada

<sup>6</sup> Department of Psychiatry, University of Toronto, Toronto M5T-1R8, ON, Canada

<sup>7</sup> Department of Chemistry, The University of West Indies at Mona, Kingston, Jamaica

\*Correspondence: neil.vasdev@utoronto.ca (N.V.); nickeisha.stephenson@uwimona.edu.jm (N.A.S.); Tel.: 416-535-8501 ext. 30988 (N.V.); 1-876-927-1910 (N.A.S)

## FXN HPLC Traces

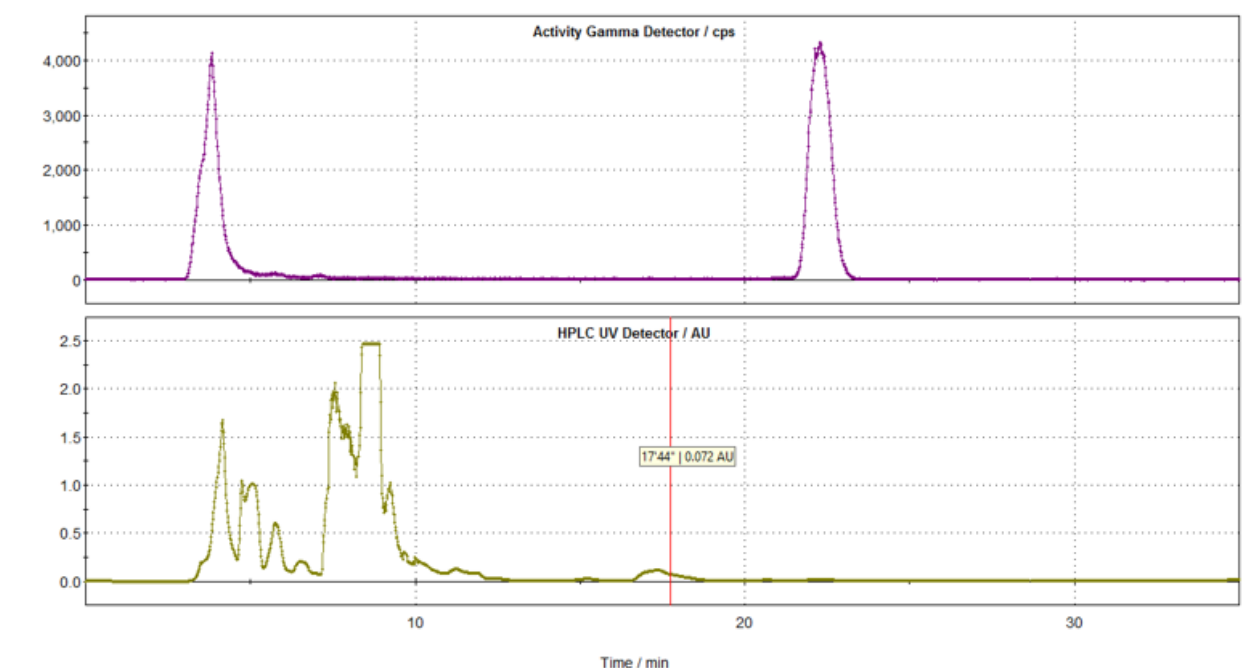

Figure S1. Semipreparative HPLC trace of a typical radiosynthesis of  $[^{18}\text{F}]$ FPPEB using precursor (5).

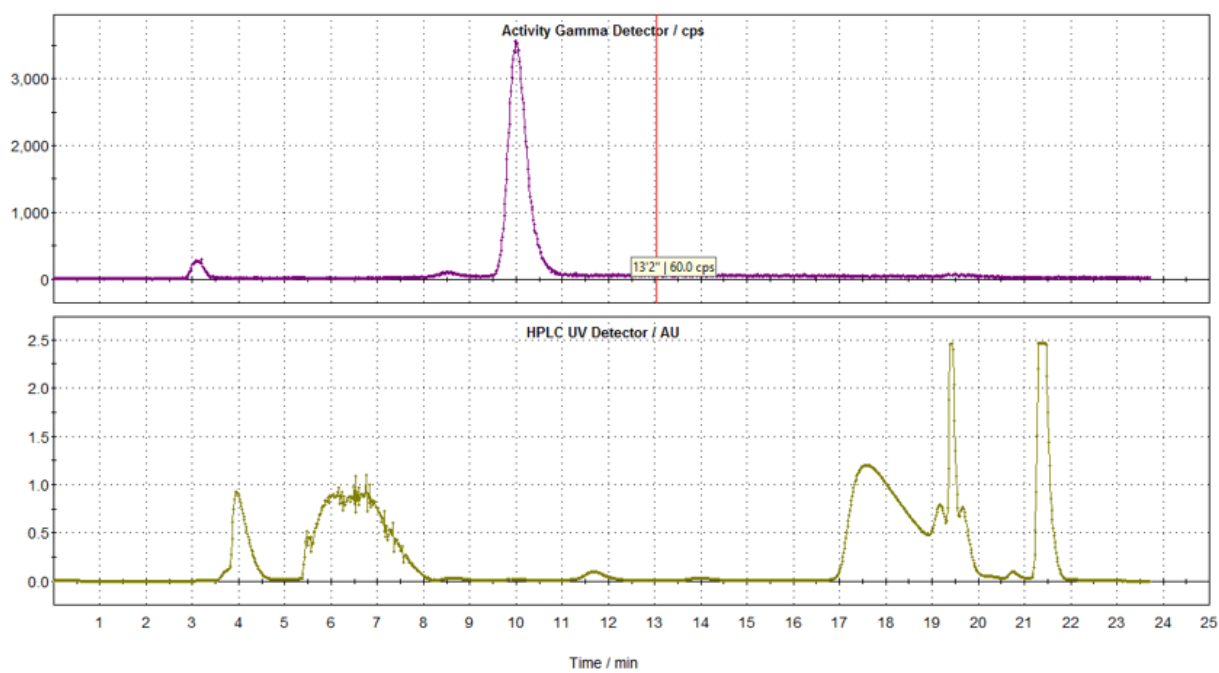

Figure S2. Semipreparative HPLC trace of a typical radiosynthesis of  $[^{18}\text{F}]$ FPPEB using precursor (6).

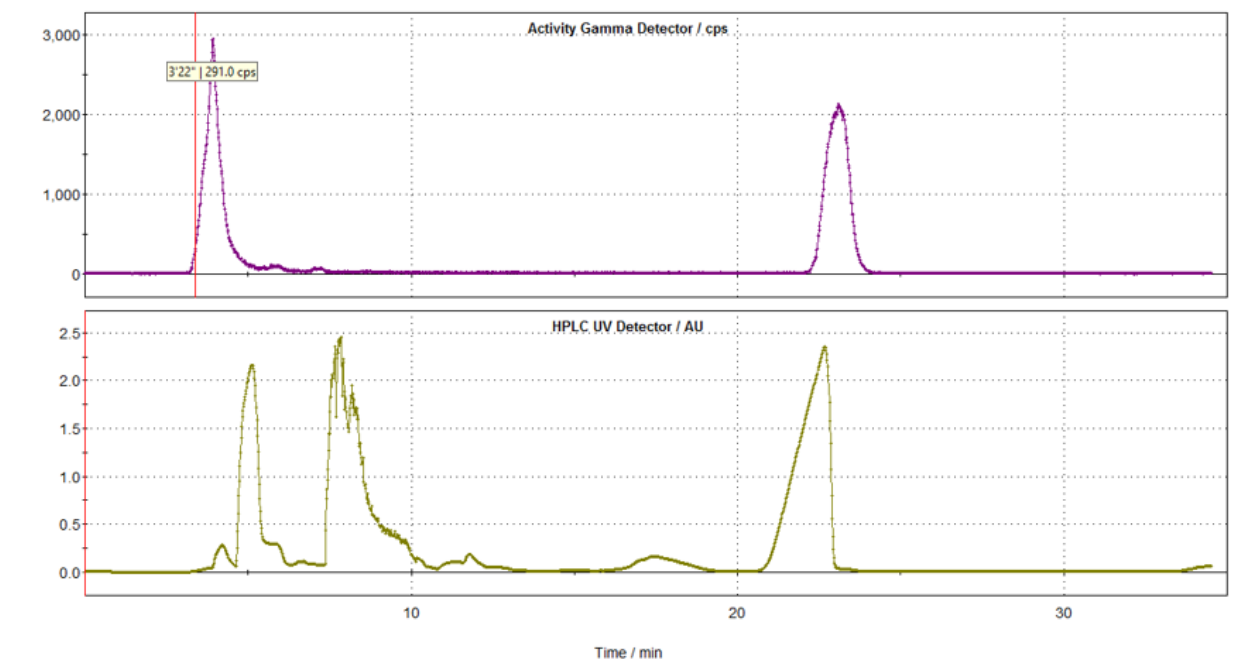

**Figure S3.** Semipreparative HPLC trace of a typical radiosynthesis of [ $^{18}\text{F}$ ]FPEB using precursor (7).
